# Supplementary material
Source: publisher site journal article supplement (https://www.degruyterbrill.com/publication/isbn/9783486845280/downloadAsset/9783486845280_Buchinformation.pdf)
Supplement: Supplementary file 1 [file 9783486845280_Buchinformation.pdf]

## Was bleibt vom Kuchen?

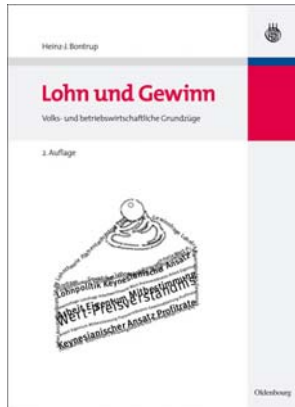

Heinz-J. Bontrup

### Lohn und Gewinn

Volks- und betriebswirtschaftliche Grundzüge

2., vollständig überarb. u. erw. Aufl. 2008 | 363 Seiten |  
Flexcover | € 39,80 | ISBN 978-3-486-58472-1

Ein aktuelles und zugleich alt bekanntes Problem: Beschäftigte fordern für ihre Arbeit möglichst viel Lohn, doch die Unternehmer wollen so wenig wie möglich bezahlen. Ein Dilemma, das in den letzten Monaten des Öfteren in einem handfesten Streik mündete.

Die Diskussion um die richtige Verteilung des Einkommens wird aufgrund der Globalisierung und der Liberalisierung der Märkte immer kontroverser und härter ausgetragen.

Das in 2. Auflage völlig überarbeitete und erweiterte Buch "Lohn und Gewinn" untersucht genau diesen Verteilungskonflikt sowohl im theoretischen – inkl. einer dogmentheoretischen und historischen Betrachtung – als auch im praktischen tarifpolitischen Duktus. Hierbei werden sowohl volks- als auch betriebswirtschaftliche Aspekte beleuchtet. Eine klare verteilungspolitische Schlussfolgerung des Autors kommt dabei nicht zu kurz.

---

Dieses Buch wendet sich nicht nur an Studierende. Es ist ein Muss für Politiker, Medienvertreter sowie Tarifexperten der Gewerkschaften und Arbeitgeberverbände. Für Volks- und Betriebswirte ist es zudem eine spannende Lektüre.

---

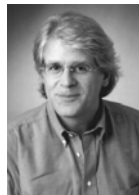

Prof. Dr. Heinz Bontrup ist Professor an der FH Gelsenkirchen, Abteilung Recklinghausen, Fachbereich Wirtschaftsrecht. Sein Lehrgebiet: Betriebswirtschaftslehre, insbesondere Personalwirtschaft und Organisation.

[oldenbourg.de](http://oldenbourg.de)

**Pressereferat Wirtschafts- und Sozialwissenschaften**

Oldenbourg Wissenschaftsverlag | Rosenheimer Str. 145 | 81679 München

Tel.: +49 89 45051-467 | Fax: +49 89 45051-292 | [kuttig@oldenbourg.de](mailto:kuttig@oldenbourg.de)

Alle Veröffentlichungen des Oldenbourg Verlags sind über den Buchhandel zu beziehen.  
Bei Lieferung fallen Versandgebühren an. Rezensionsexemplare auf Anforderung.
